# Supplementary material for: Extended isomerism in heteronuclear metal–organic frameworks: synthetic strategies and crystal structures of lanthanide–cobalt–oxydiacetate systems
Source: Royal Society of Chemistry journal article supplement (doi:10.1039/d4ce00168k), 2024-01-01
Supplement: d4ce00168k1.pdf [file d4ce00168k1.pdf]

### Supplementary information

Extended isomerism in heteronuclear metal-organic frameworks: synthetic strategies and crystal structures of lanthanide-cobalt-oxydiacetate systems

**Fernando Igoa<sup>a</sup>, Agustín López<sup>a</sup>, Javier González-Platas<sup>b</sup>, Leopoldo Suescun<sup>c</sup>, Carlos Kremer<sup>a</sup>, Julia Torres<sup>a\*</sup>**

<sup>a</sup> Área Química Inorgánica, Departamento Estrella Campos (DEC), Facultad de Química, Universidad de la República, Montevideo, Uruguay

<sup>b</sup> Departamento de Física, Instituto Universitario de Estudios Avanzados en Física Atómica, Molecular y Fotónica (IUDEA), MALTA-Cosolider Team, Universidad de La Laguna, Tenerife, Spain

<sup>c</sup> Cryssmat-Lab, DETEMA, Facultad de Química, Universidad de la República, Montevideo, Uruguay

\*Corresponding author. [jtorres@fq.edu.uy](mailto:jtorres@fq.edu.uy)

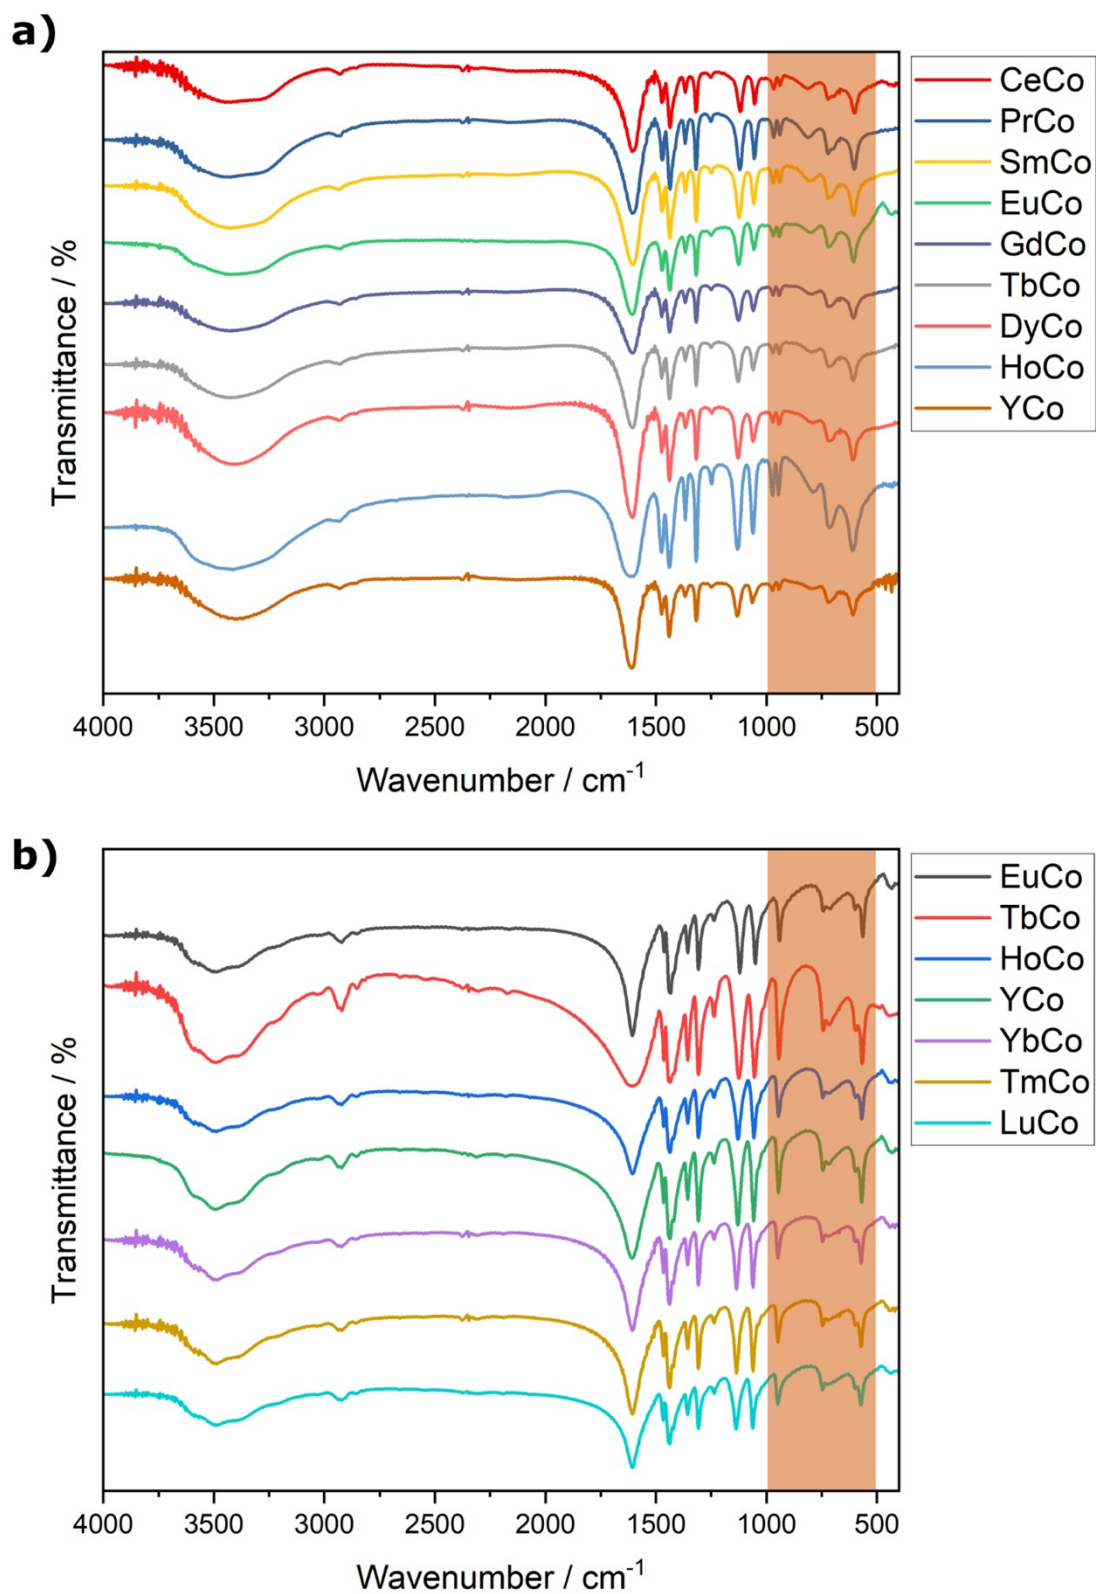

Figure S1 – a) Infrared spectra of the new LnCo compounds showing hexagonal or b) cubic structures. The zone where spectra of both types of compounds show most marked differences is highlighted.

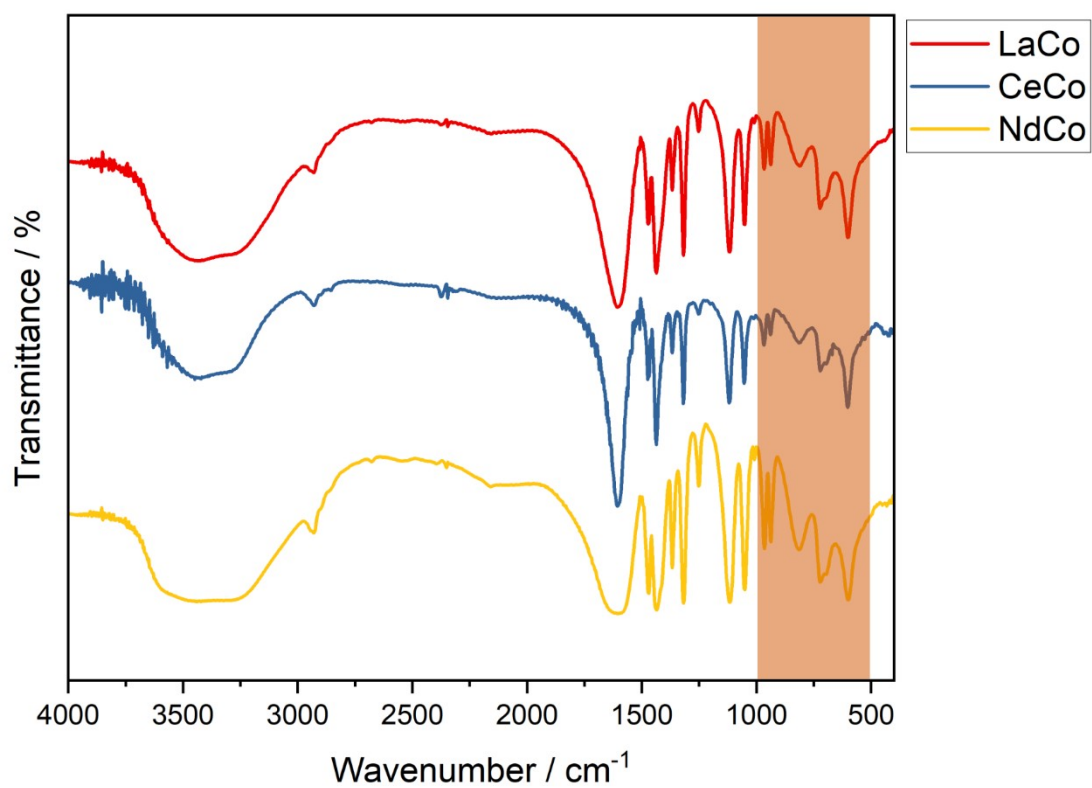

Figure S2 – Infrared spectra of **LaCo<sup>H</sup>**, **CeCo<sup>H</sup>** and **NdCo<sup>H</sup>** prepared following the hydrothermal synthesis (at 180 °C for 3 days).

Table S1 – Numbering scheme for the compounds prepared in this work.

| Number | Nomenclature in this work | Comment                                                                 |
|--------|---------------------------|-------------------------------------------------------------------------|
| 1      | <b>LaCo<sup>H</sup></b>   | Hexagonal, single crystal structure previously reported in <sup>1</sup> |
| 2      | <b>CeCo<sup>H</sup></b>   | Hexagonal, single crystal structure reported in this work               |
| 3      | <b>PrCo<sup>H</sup></b>   | Hexagonal, single crystal structure reported in this work               |
| 4      | <b>NdCo<sup>H</sup></b>   | Hexagonal, single crystal structure previously reported in <sup>2</sup> |
| 5      | <b>SmCo<sup>H</sup></b>   | Hexagonal, single crystal structure reported in this work               |
| 6      | <b>EuCo<sup>H</sup></b>   | Hexagonal, single crystal structure reported in this work               |
| 7      | <b>GdCo<sup>H</sup></b>   | Hexagonal, single crystal structure reported in this work               |
| 8      | <b>TbCo<sup>H</sup></b>   | Hexagonal, single crystal structure reported in this work               |
| 9      | <b>DyCo<sup>H</sup></b>   | Hexagonal, single crystal structure reported in this work               |
| 10     | <b>HoCo<sup>H</sup></b>   | Hexagonal, single crystal structure reported in this work               |
| 11     | <b>YCo<sup>H</sup></b>    | Hexagonal, single crystal structure reported in this work               |
| 12     | <b>EuCo<sup>C</sup></b>   | Cubic, single crystal structure reported in this work                   |
| 13     | <b>TbCo<sup>C</sup></b>   | Cubic, single crystal structure reported in this work                   |
| 14     | <b>HoCo<sup>C</sup></b>   | Cubic, single crystal structure reported in this work                   |
| 15     | <b>YCo<sup>C</sup></b>    | Cubic, single crystal structure reported in this work                   |
| 16     | <b>TmCo<sup>C</sup></b>   | Cubic, single crystal structure reported in this work                   |
| 17     | <b>YbCo<sup>C</sup></b>   | Cubic, single crystal structure reported in this work                   |
| 18     | <b>LuCo<sup>C</sup></b>   | Cubic, single crystal structure reported in this work                   |

Table S2 – Channel dimensions and water content variation among hexagonal compounds obtained in this work.

| Ln              | Shannon's radii (Å) <sup>a</sup> | Channel volume (Å <sup>3</sup> ) <sup>b</sup> | Channel diameter (Å) <sup>c</sup> | Crystallization water content | Coordination water content |
|-----------------|----------------------------------|-----------------------------------------------|-----------------------------------|-------------------------------|----------------------------|
| La <sup>d</sup> | 1.216                            | 1034                                          | 9.31                              | 14                            | 6                          |
| Ce              | 1.196                            | 1041                                          | 9.33                              | 14                            | 6                          |
| Pr              | 1.179                            | 1041                                          | 9.32                              | 14                            | 6                          |
| Nd <sup>d</sup> | 1.163                            | 1021                                          | 9.18                              | 14                            | 6                          |
| Sm              | 1.132                            | 973                                           | 8.92                              | 13                            | 6                          |
| Eu              | 1.120                            | 957                                           | 8.82                              | 13                            | 6                          |
| Gd              | 1.107                            | 941                                           | 8.74                              | 13                            | 6                          |
| Tb              | 1.095                            | 936                                           | 8.70                              | 13                            | 6                          |
| Dy              | 1.083                            | 912                                           | 8.54                              | 12                            | 6                          |
| Y               | 1.075                            | 905 <sup>e</sup>                              | 8.54                              | 12                            | 6                          |
| Ho              | 1.072                            | 913                                           | 8.55                              | 12                            | 6                          |

<sup>a</sup>Shannon's ionic radii for coordination number 9.<sup>3</sup> <sup>b</sup>Channel volume calculated from single-crystal data in PLATON software.<sup>4</sup> <sup>c</sup>Channel diameter calculated from modeling the empty volume as a cylinder of base radii equal to the calculated diameter and height *c* (crystallographic edge). <sup>d</sup>Although these compounds were previously reported, they were prepared *de novo* under the same conditions of this work in order to determine the water content from a pure hexagonal sample. <sup>e</sup>Only the major occupied part of the disordered oda ligand was considered for calculating the channel volume in this structure.

## References

- 1 S. Domínguez, J. Torres, F. Peluffo, A. Mederos, J. González-Platas, J. Castiglioni and C. Kremer, *Journal of Molecular Structure*, 2007, **829**, 57–64.
- 2 J.-X. Li, Z.-X. Du and W.-P. Huang, *Zeitschrift für Naturforschung B*, 2011, **66**, 1029–1034.
- 3 R. D. Shannon, *Acta Cryst A*, 1976, **32**, 751–767.
- 4 A. L. Spek, *J Appl Crystallogr*, 2003, **36**, 7–13.
